# Supplementary material for: A Comprehensive Pan-Cancer Analysis Identifies CEP55 as a Potential Oncogene and Novel Therapeutic Target
Source: MDPI journal article supplement (doi:10.3390/diagnostics13091613), 2023-05-02
Supplement: s1 [file s1]

### 1) Supplementary table

Supplementary Table S1. The abbreviations and the full name of analyzed tumors in the current study

| Abbrviation | Tumor name                                                       |
|-------------|------------------------------------------------------------------|
| ACC         | Adrenocortical carcinoma                                         |
| BLCA        | Bladder Urothelial Carcinoma                                     |
| BRCA        | Breast invasive carcinoma                                        |
| CESC        | Cervical squamous cell carcinoma and endocervical adenocarcinoma |
| CHOL        | Cholangiocarcinoma                                               |
| COAD        | Colon adenocarcinoma                                             |
| DLBC        | Lymphoid Neoplasm Diffuse Large B-cell Lymphoma                  |
| ESCA        | Esophageal carcinoma                                             |
| GBM         | Glioblastoma multiforme                                          |
| HNSC        | Head and Neck squamous cell carcinoma                            |
| KICH        | Kidney Chromophobe                                               |
| KIRC        | Kidney renal clear cell carcinoma                                |
| KIRP        | Kidney renal papillary cell carcinoma                            |
| LAML        | Acute Myeloid Leukemia                                           |
| LGG         | Brain Lower Grade Glioma                                         |
| LIHC        | Liver hepatocellular carcinoma                                   |
| LUAD        | Lung adenocarcinoma                                              |
| LUSC        | Lung squamous cell carcinoma                                     |
| MESO        | Mesothelioma                                                     |
| OV          | Ovarian serous cystadenocarcinoma                                |
| PAAD        | Pancreatic adenocarcinoma                                        |

---

|      |                                      |
|------|--------------------------------------|
| PCPG | Pheochromocytoma and Paraganglioma   |
| PRAD | Prostate adenocarcinoma              |
| READ | Rectum adenocarcinoma                |
| SARC | Sarcoma                              |
| SKCM | Skin Cutaneous Melanoma              |
| STAD | Stomach adenocarcinoma               |
| TGCT | Testicular Germ Cell Tumors          |
| THCA | Thyroid carcinoma                    |
| THYM | Thymoma                              |
| UCEC | Uterine Corpus Endometrial Carcinoma |
| UCS  | Uterine Carcinosarcoma               |
| UVM  | Uveal Melanoma                       |

---
